# Supplementary material for: Mitochondrial respiration controls neoangiogenesis during wound healing and tumour growth
Source: Nat Commun. 2020 Jul 21;11:3653. doi: 10.1038/s41467-020-17472-2 (PMC7374592; doi:10.1038/s41467-020-17472-2)
Supplement: Supplementary file 1 — Supplementary Information [file 41467_2020_17472_MOESM1_ESM.pdf]

# **Mitochondrial respiration controls neoangiogenesis during wound healing and tumour growth**

Schiffmann, Werthenbach et al.

**Supplementary materials include:**

**Supplementary Figures 1 to 5**

**Supplementary Tables 1 and 2**

Supplementary Figure 1

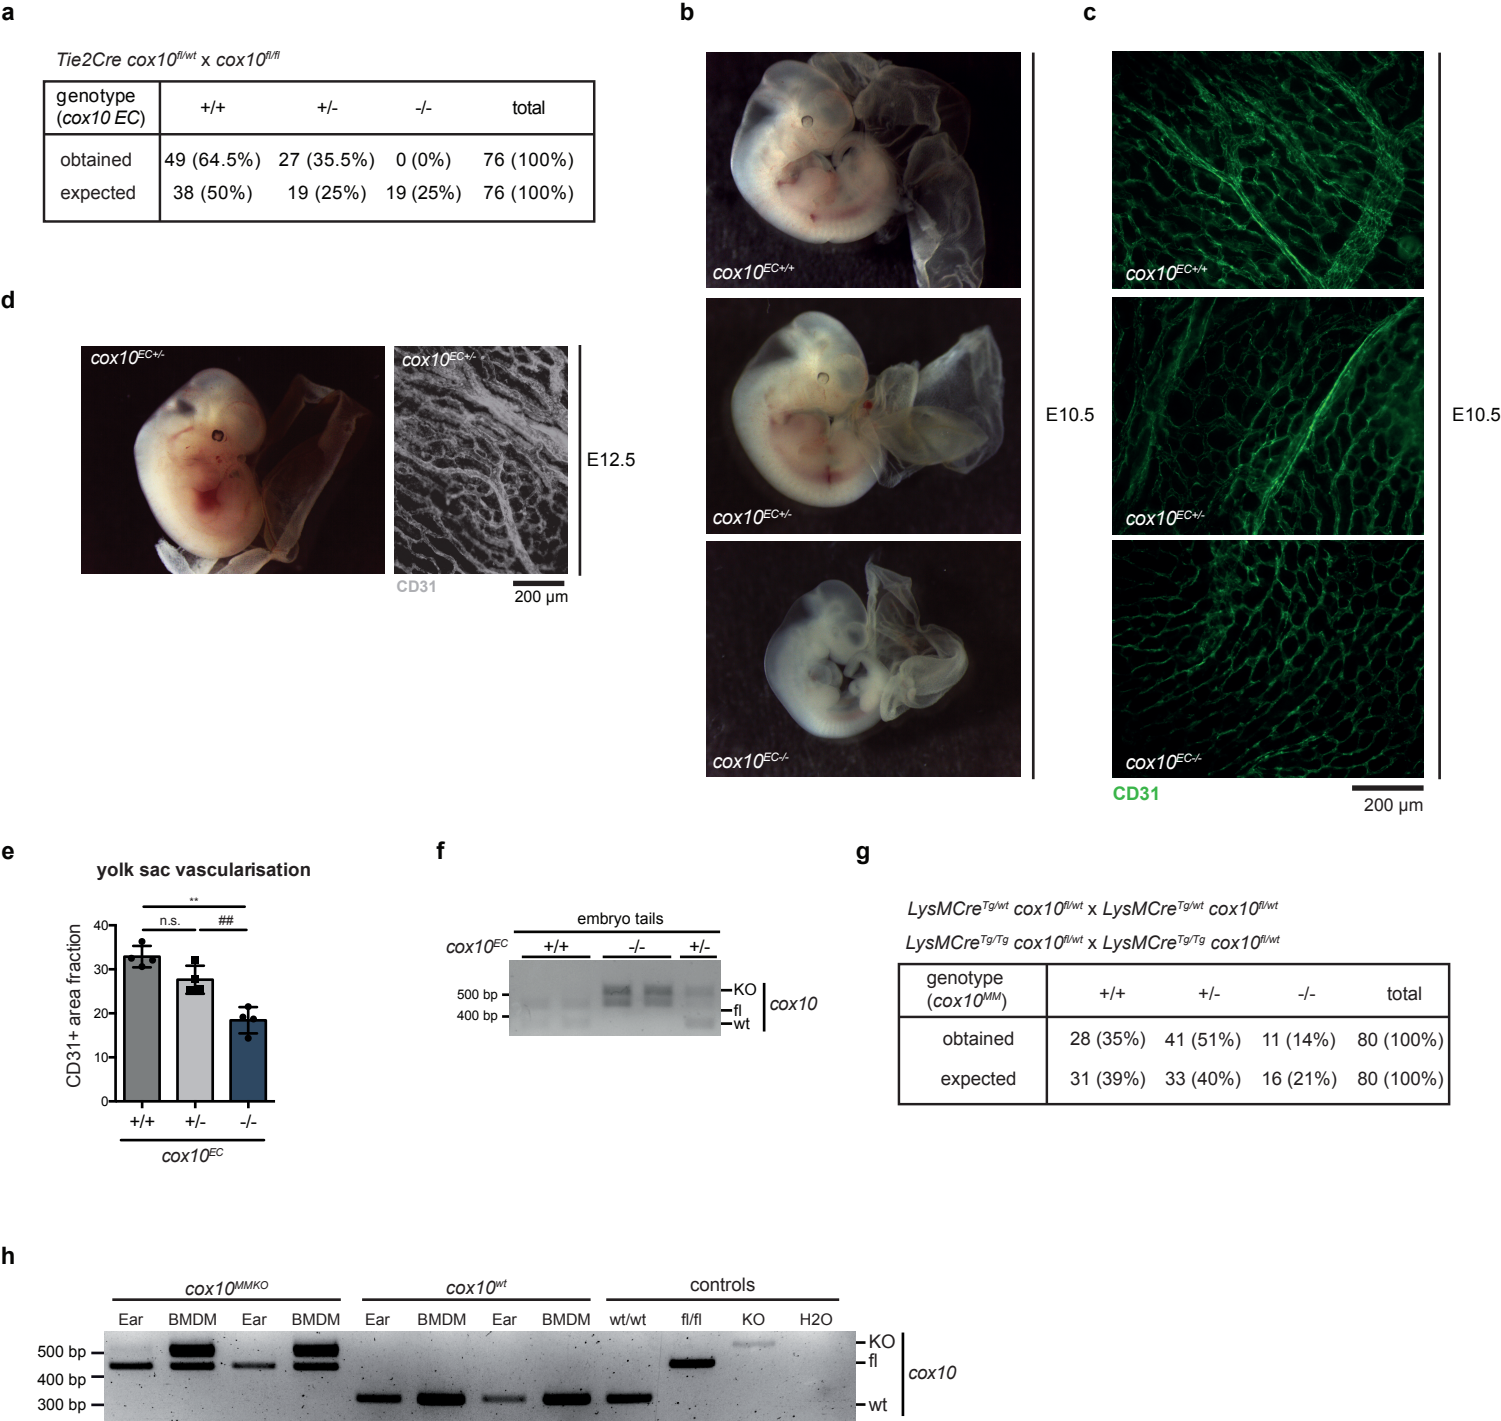

### Supplementary Figure 1: Endothelial *cox10* is required for embryonic development

**a**, breeding scheme and table depicting expected and obtained (mendelian ratio %) progeny.

**b**, representative images of embryos with the respective genotypes at day E10.5. **c**, representative fluorescent images of E10.5 whole mount yolk sacs stained with anti-CD31 antibody. **d**, representative E12.5 heterozygous *cox10* EC-deficient embryo (left panel) and the corresponding yolk sac whole mount stained for CD31. **e**, quantification of yolk sac vascularisation of E 12.5 embryos representing all 3 genotypes (compare Fig. 1 c). **f**, *cox10* PCR analysis of dissected *cox10*<sup>EC+/+</sup>, *cox10*<sup>EC+/-</sup> and *cox10*<sup>EC-/-</sup> embryos. **g**, breeding scheme and table depicting expected and obtained (mendelian ratio %) progeny from crossing *LysMCre*<sup>Tg/Tg</sup> *cox10*<sup>fl/wt</sup> to *LysMCre*<sup>Tg/Tg</sup> *cox10*<sup>fl/wt</sup> or *LysMCre*<sup>Tg/wt</sup> *cox10*<sup>fl/wt</sup> to *LysMCre*<sup>Tg/wt</sup> *cox10*<sup>fl/wt</sup>. **h**, PCR analysis of isolated bone marrow derived macrophages (BMDMs) and ear tags of either *cox10*<sup>fl/fl</sup> *LysMCre*<sup>tg/tg</sup> (*cox10*<sup>MMKO</sup>) or *cox10*<sup>wt/wt</sup> *LysMCre*<sup>tg/tg</sup> (*cox10*<sup>wt</sup>). PCR controls were derived from ear cuts (wt/wt and fl/fl) or cre treated MAFS isolated from *cox10*<sup>fl/fl</sup> mice (KO). Data in (**e**) are presented as mean ± SD. Individual data points in **e** represent analysed mice per genotype n=4. Exact p-values (two-way ANOVA, Bonferroni post-hoc): \*\*: 0.0002, n.s.: 0.0898, ##: 0.0043.

## Supplementary Figure 2

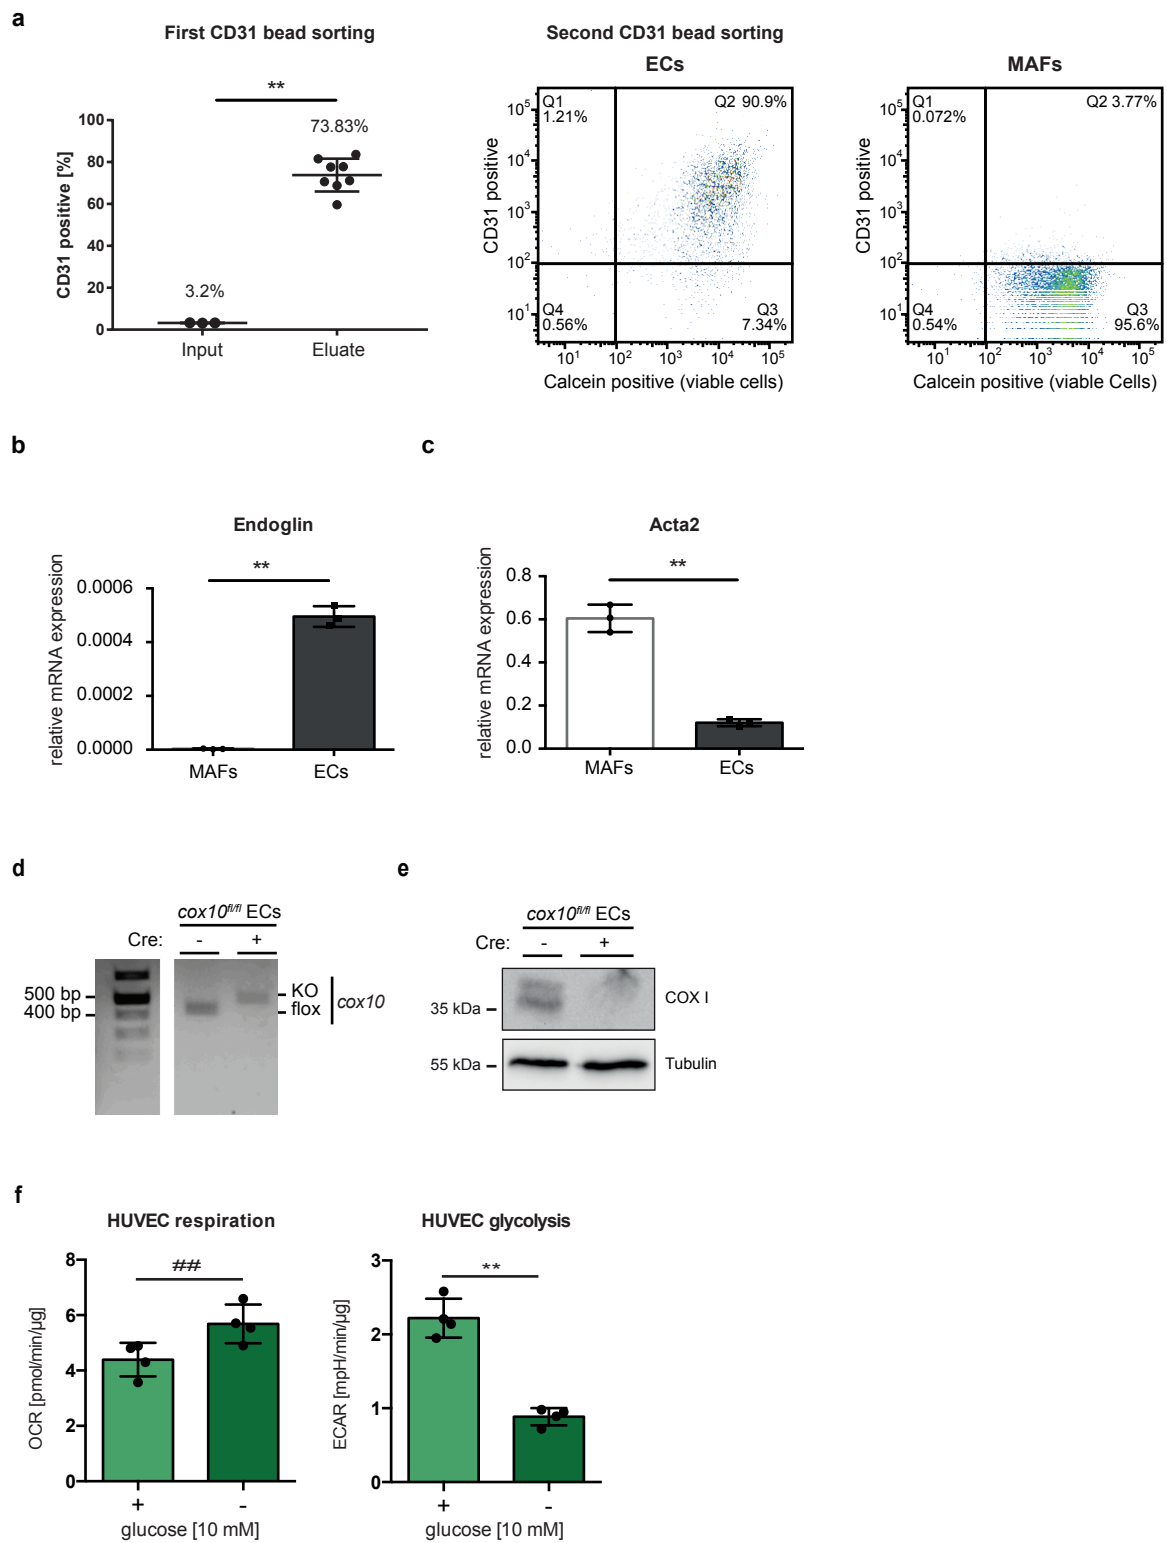

### Supplementary Figure 2: Loss of endothelial *cox10* varies EC metabolic phenotype

**a**, fluorescent activated cell sorting (FACS) of lung cells before (input) and after (eluate) EC enrichment via CD31 bead sorting (First sorting (left panel), re-sorting (middle panel), negative control (murine adult fibroblasts, right panel)). Cells were labelled with CD31 antibody alone or together with calcein as a viability marker. **b**, **c**, quantitative PCR analysis showing relative mRNA levels of specific markers ((**b**) Endoglin, (**c**) Acta2) of murine fibroblasts vs. isolated primary murine ECs. **d**, PCR analysis of isolated untreated and Cre-treated *cox10*<sup>fl/fl</sup> ECs. **e**, Western blot of protein levels of COX subunit I of isolated untreated and Cre treated *cox10*<sup>fl/fl</sup> ECs. Tubulin served as loading control. **f**, OCR and ECAR of human umbilical vein endothelial cells (HUVECs) in the presence and absence of glucose. Data are presented as mean  $\pm$  SD. Individual data points in (**a**), (**b**), (**c**), (**f**) represent technical replicates within a representative experiment. Sample size: (**a**): n=3 (Input), n=8 (eluate), (**b**): n=3 vs. n=3, (**c**): n=3 vs. n=3, (**f**): n=4 for each group. Exact p-values (unpaired students t-test, two tailed): (**a**): <0.0001, (**b**): <0.0001, (**c**): 0.0002. (**f**) ## 0.0079 \*\* 0.0007.

Supplementary Figure 3

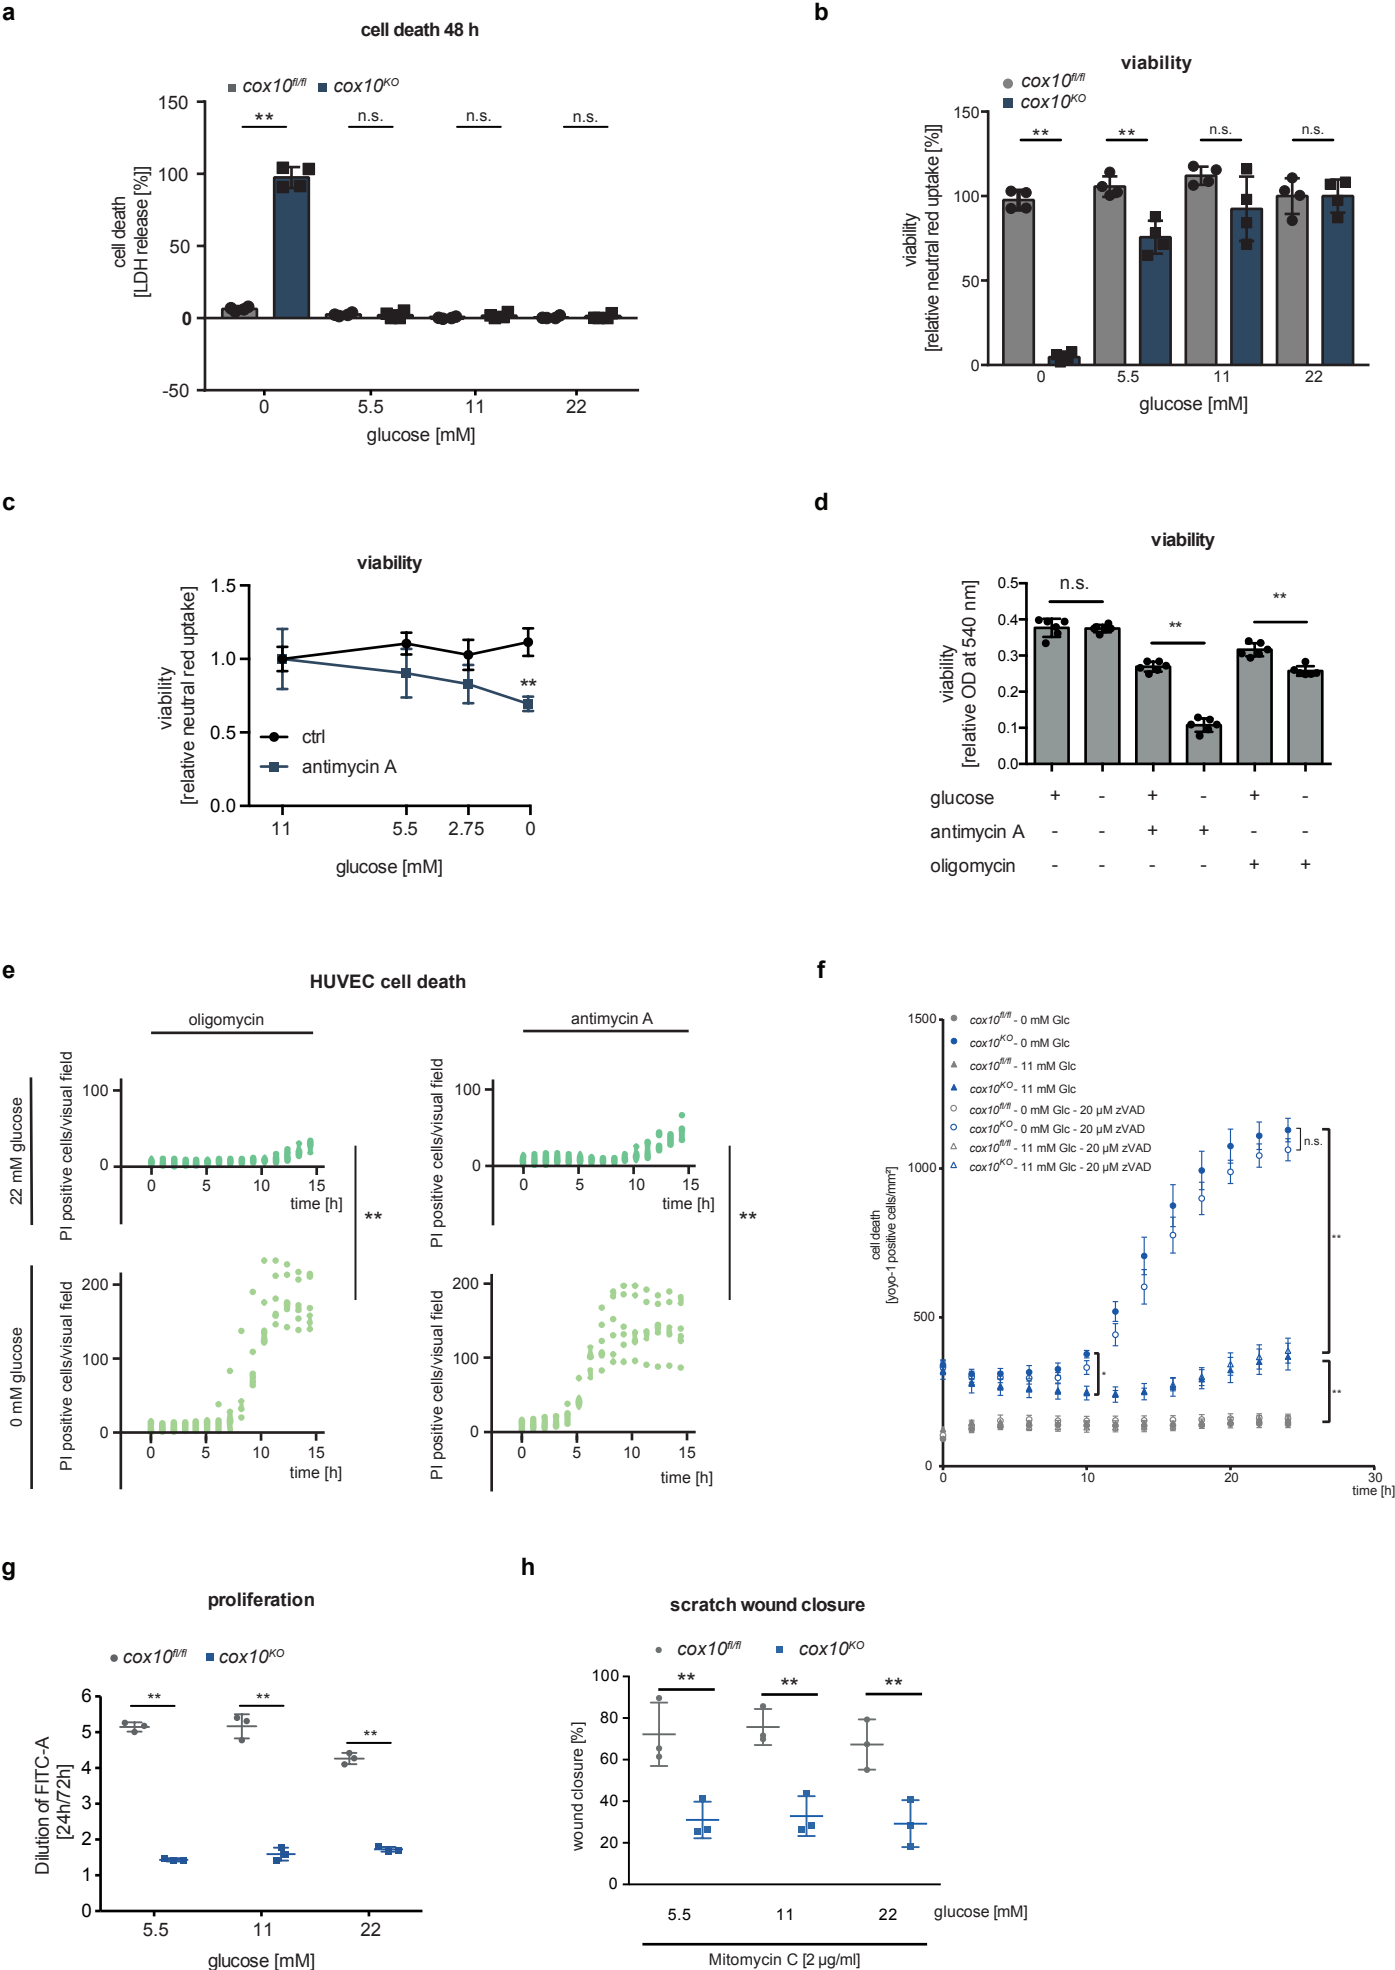

### Supplementary Figure 3: Cox10 is essential for EC function

**a**, cell death of *cox10<sup>fl/fl</sup>* ECs and *cox10<sup>KO</sup>* ECs with increasing concentrations of glucose after 48 h and measured by LDH release. **b**, viability of *cox10<sup>fl/fl</sup>* ECs and *cox10<sup>KO</sup>* ECs subjected to 0 mM, 5.5 mM, 11 mM and 22 mM glucose over 48 h and measured by neutral red uptake. **c**, viability of *cox10<sup>fl/fl</sup>* and *cox10<sup>KO</sup>* ECs under decreasing concentrations of glucose left untreated (ctrl) or after treatment with antimycin A (10  $\mu$ M) measured by neutral red uptake. **d**, viability of primary murine wildtype ECs in 0 mM glucose vs. 22 mM glucose conditions in response to pharmacological targeting of the respiratory chain (oligomycin 2  $\mu$ M, antimycin A 10  $\mu$ M). **e**, kinetics of cell death (PI uptake) using a live imaging microscopic quantification of HUVECs exposed to oligomycin or antimycin A in the presence of 0 mM glucose vs. 22 mM glucose. **f**, live cell death analysis of *cox10<sup>fl/fl</sup>* and *cox10<sup>KO</sup>* ECs treated with 0 mM and 11 mM glucose over 24h in the presence or absence of zVAD-fmk (20  $\mu$ M) monitored with an incucyte system. **g**, proliferation of *cox10<sup>fl/fl</sup>* and *cox10<sup>KO</sup>* ECs at indicated glucose concentrations over 72 h. **h**, quantification of scratch wound closure of monolayer cultured control *cox10<sup>fl/fl</sup>* and *cox10<sup>KO</sup>* ECs (% of wound closure) at indicated glucose levels after 16 h in the presence of mitomycin C. Data are presented as mean  $\pm$  SD. Sample sizes: **(a)** n=4, **(b)** n=4, **(c)** n=3 **(d)** n=5, **(e)** n=6, **(f)** n=3, **(g)** n=3, **(h)** n=3. Individual data points in **(a)**, **(b)**, **(c)**, **(d)**, **(e)**, **(f)**, **(g)** and **(h)** represent technical replicates within a representative experiment. Exact p-values (unpaired students t-test, two tailed): **(a)**: <0.0001, n.s. (from left to right): 0.7851, 0.1657, 0.6949; **(b)**: from left to right: <0.001, 0.0066, 0.2631, >0.9999; **(c)**: 0.0023; **(d)** \*\* < 0.0001; Two-way ANOVA followed by Bonferroni post-hoc analysis comparing mean PI values at t=15 h within treatment groups stratifying for glucose concentrations: **(e)** both \*\* <0.0001). P-values (two-way ANOVA followed by Bonferroni post-hoc test): **(f)**: \*\*<0.0001 \*<0.0005, n.s. 0.0925; **(g)** \*\*<0.0001. Multiple t-tests (two tailed) followed by Sidak-bonferroni method: **(h)**: 5.5: 0.0155, 11: 0.0045, 22: 0.0162.

Supplementary Figure 4

a

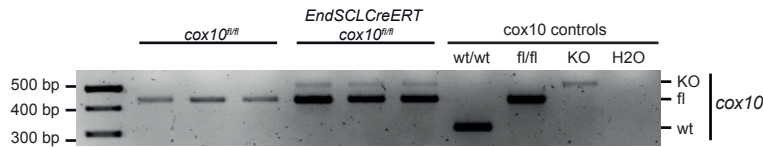

b

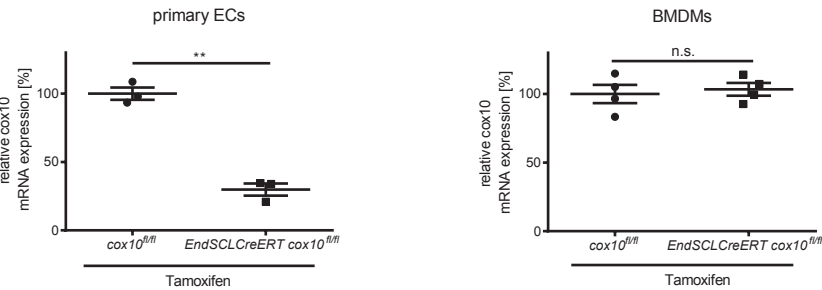

c

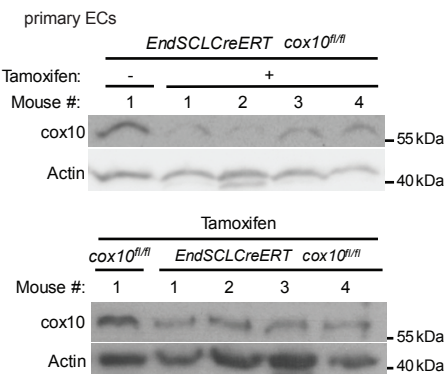

d

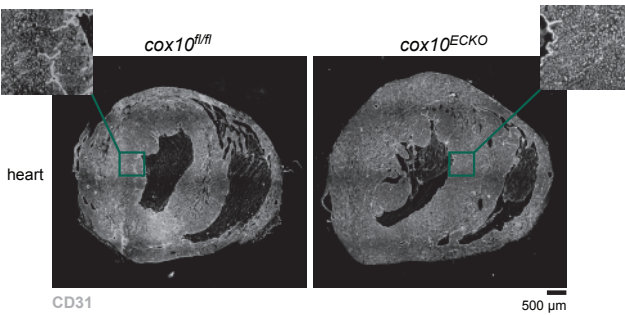

e

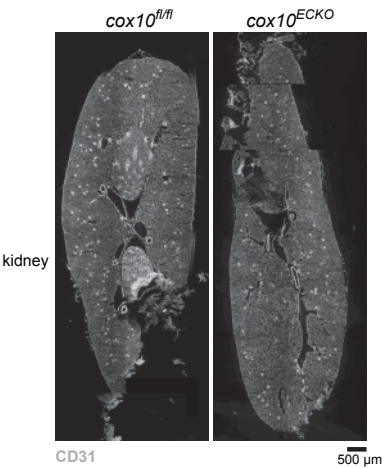

f

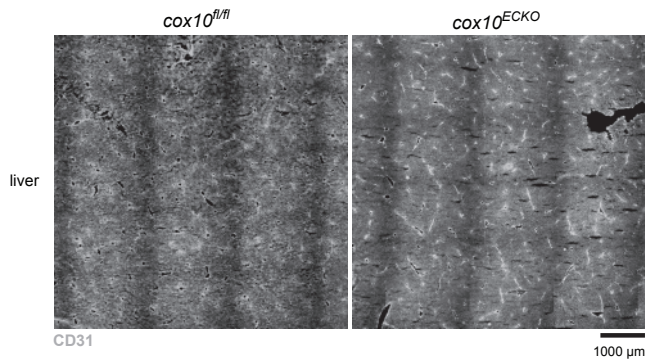

g

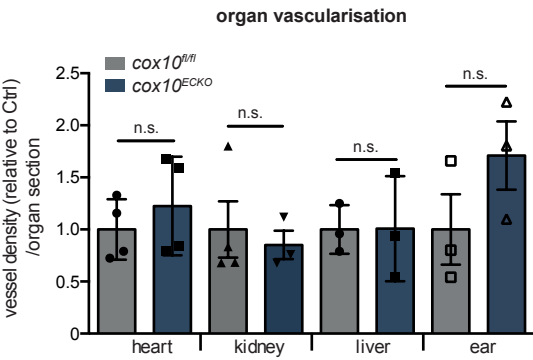

#### Supplementary Figure 4: *Cox10* is essential for EC function

**a**, PCR analysis of ear cuts from tamoxifen treated *cox10<sup>fl/fl</sup>* and *EndSCLCreERT cox10<sup>fl/fl</sup>* animals. **b**, *cox10* RT-PCR of freshly isolated primary lung endothelial cells and bone marrow derived macrophages from tamoxifen treated *cox10<sup>fl/fl</sup>* and *EndSCLCreERT cox10<sup>fl/fl</sup>* animals. **c**, COX10 Western blot analysis of freshly isolated primary lung endothelial cells from *cox10<sup>fl/fl</sup>* or *EndSCLCreERT cox10<sup>fl/fl</sup>* animals treated with tamoxifen or left untreated as indicated. **d**, representative fluorescent images of CD31 stained hearts from *cox10<sup>fl/fl</sup>* control vs. *cox10<sup>ECKO</sup>* mice. **e**, CD31 stained kidneys from *cox10<sup>fl/fl</sup>* control vs. *cox10<sup>ECKO</sup>* mice. **f**, multiple image alignment of liver sections from *cox10<sup>fl/fl</sup>* control vs. *cox10<sup>ECKO</sup>* mice stained for CD31. **g**, quantification of organ vascularisation in mice of indicated genotype. Data are presented as mean  $\pm$  SD. Sample sizes: **(b)** n=3 vs n=3 (primary ECs) and n=4 vs n=4 (BMDMs). **(g)**: n=4 (wt) vs. 4 (*cox10<sup>ECKO</sup>*) (heart), n=4 vs. 3 (kidney), n=3 vs. 3 (liver, ear). Individual data points in **(g)** represent mean values of individual mice of the respective genotype. Exact p-values (unpaired students t-test, two-tailed): **(b)** \*\*: 0.0004 n.s.: 0.6866 **(g)**: 0.4485 (heart), 0.6794 (kidney), 0.9826 (liver), 0.2061 (ear).

Supplementary Figure 5

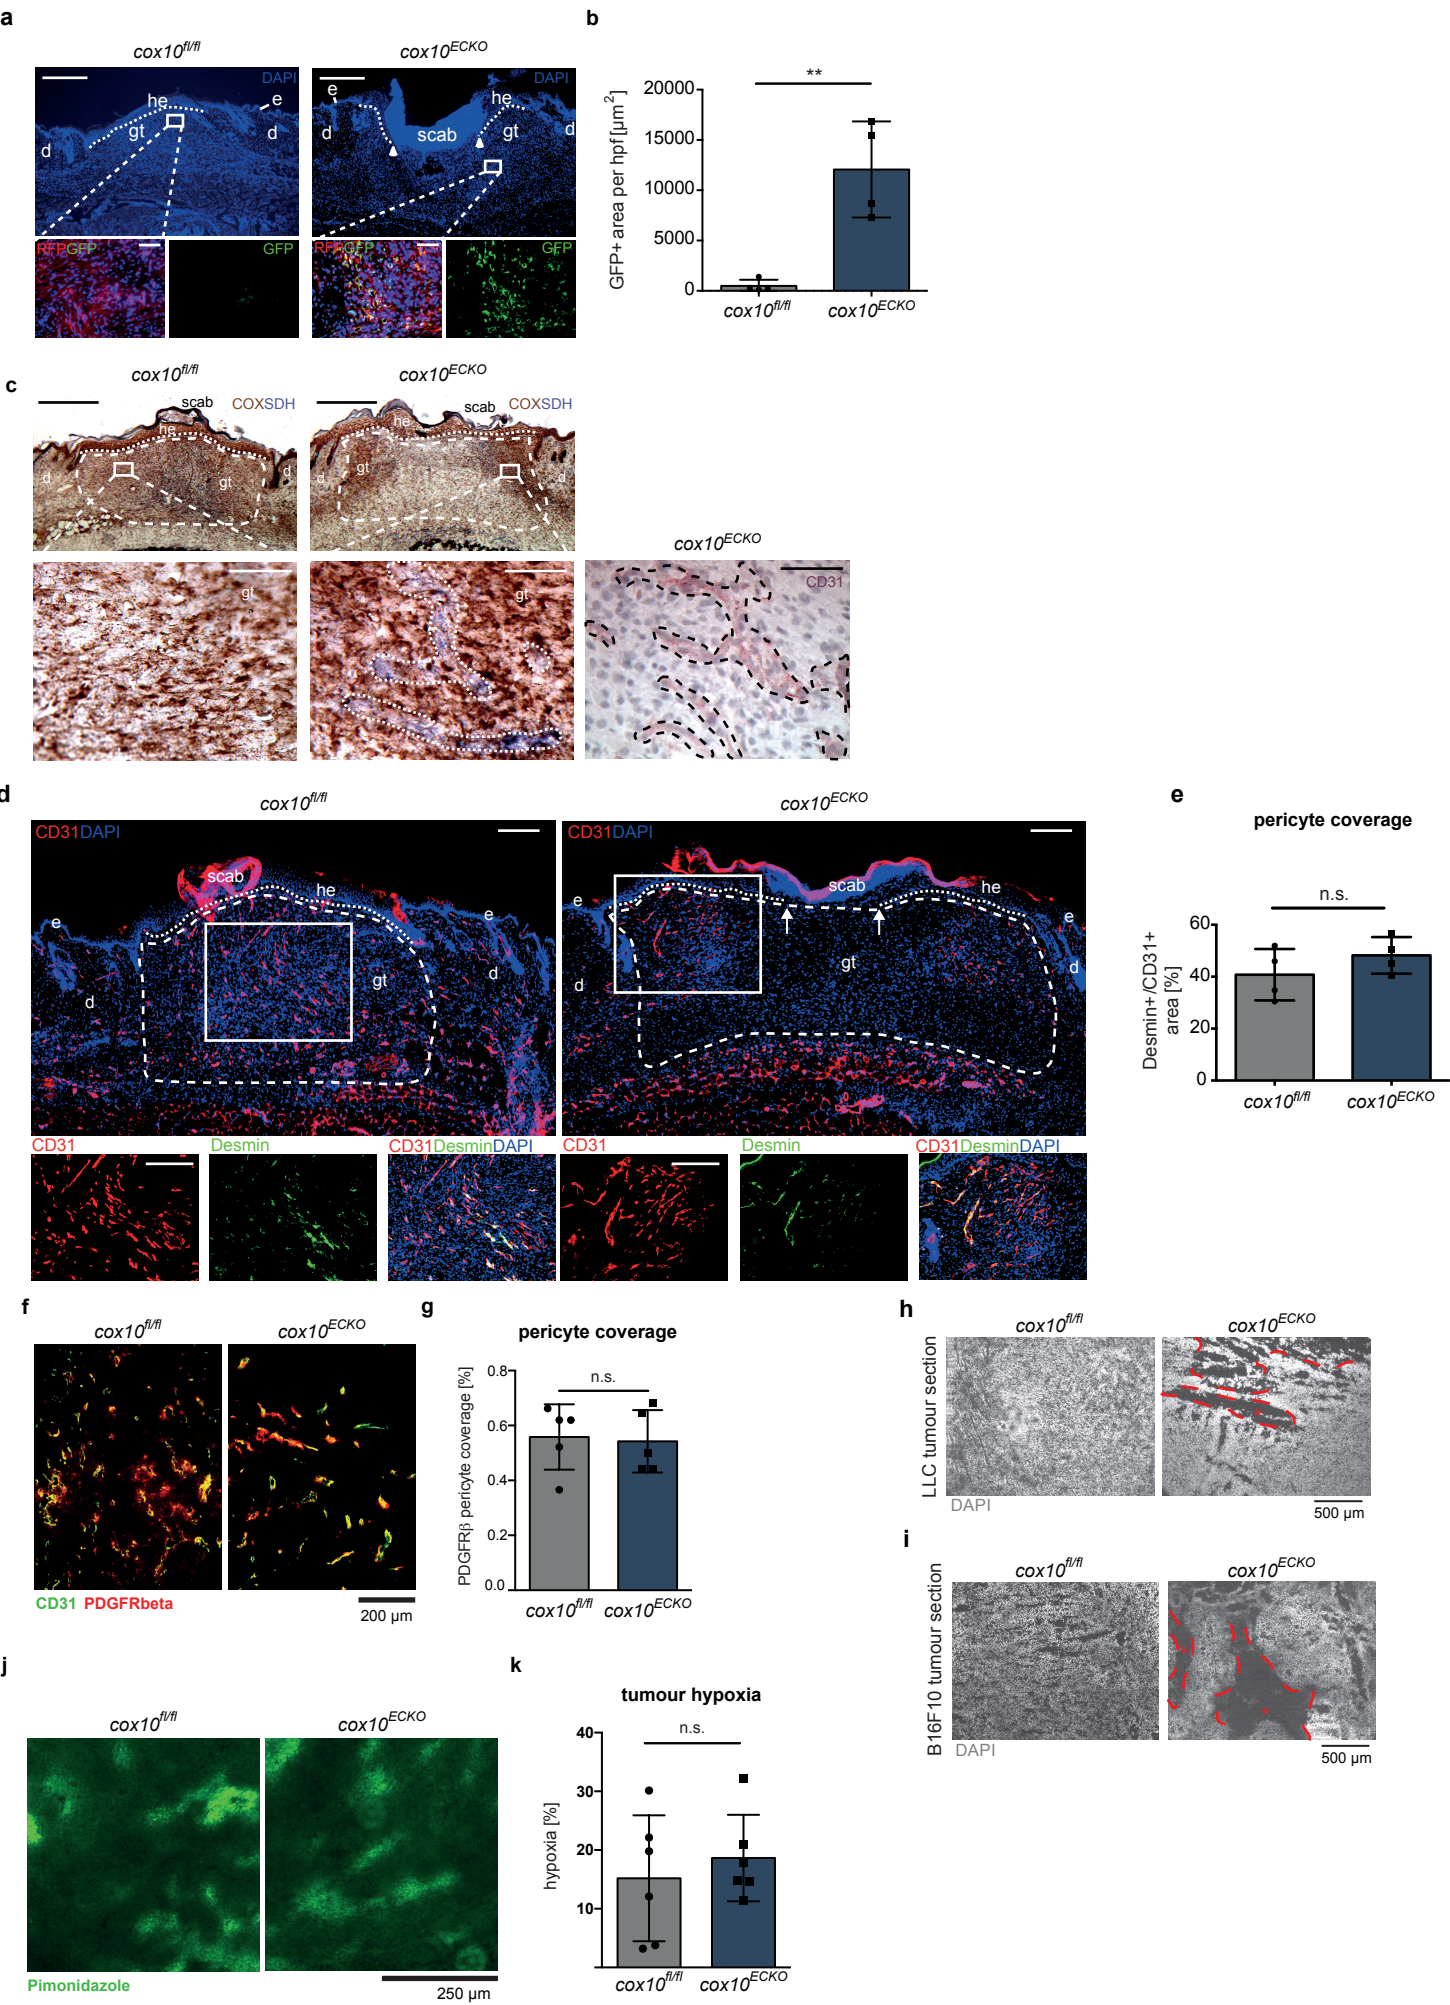

### Supplementary Figure 5: EC OxPhos is required for neoangiogenesis in wound healing and tumour growth

**a**, Representative fluorescent wound sections and **b**, quantification of GFP+ area per hpf of mice with indicated genotypes, for data obtained in **a** and **b** mice were crossed to R26mTmG reporter mice (*cox10<sup>fl/fl</sup>* R26mTmG and *EndSCLCreERT cox10<sup>fl/fl</sup>* R26mTmG). Tamoxifen treatment in these mice lead to EC specific GFP expression only in *cox10<sup>ECKO</sup>* mice; scale bar upper panel, 500  $\mu$ m; scale bar lower panel, 50  $\mu$ m. **c**, COX/SDH staining of mice with indicated genotypes (left panel) and CD31 immunostaining on a serial section in wound tissue from a *cox10<sup>ECKO</sup>* mouse (right panel); scale bar upper panel, 500  $\mu$ m; scale bar lower panel, 50  $\mu$ m. **d**, dermis; **e**, epidermis; **gt**, granulation tissue; **he**, hyperproliferative epithelium. **d**, CD31 and Desmin immunostainings of wound sections at day 7 post injury from tamoxifen treated *cox10<sup>fl/fl</sup>* and *EndSCLCreERT cox10<sup>fl/fl</sup>* (*cox10<sup>ECKO</sup>*) mice. Dotted line indicates the newly formed epithelium; dashed line indicates granulation tissue; arrows indicate the tips of the epithelial tongue; rectangles in the upper panel are highlighted in the lower panel; **d**: dermis, **e**: epidermis, **gt**: granulation tissue, **he**: hyperproliferative epithelium, scale bar: 200  $\mu$ m. **e**, quantification of the ratio of Desmin+ area versus CD31+ area within the granulation tissue. **f**, representative images of CD31+ tumour vessels (green) and PDGFRbeta stained pericytes (red) and **g**, quantification thereof. **h/i**, representative fluorescent images of LLC (**h**) or B16F10 (**i**) tumour sections of *cox10<sup>fl/fl</sup>* control vs. *cox10<sup>ECKO</sup>* mice stained for DAPI (asterisks marking necrotic areas). **j**, representative fluorescence images of pimonidazole stained LLC tumour tissue and **k**, quantification thereof. Data are presented as mean  $\pm$  SD. Individual data points in (**b**), (**e**), (**g**), (**k**) represent mean values of individual mice of the respective genotype. Sample sizes: (**b**), (**e**): n=4 for both genotypes, (**g**) n=5 for both genotypes, (**k**): n=6 for both genotypes. Exact p-values, (unpaired students t-test, two tailed): (**b**): 0.0030, (**e**): 0.2665, (**g**): 0.8395, (**k**): 0.5316.

**Supplementary Table 1: Primer list**

| <b>Locus:</b> | <b>Primer name:</b> | <b>Sequence:</b>                   |
|---------------|---------------------|------------------------------------|
| LysM Cre      | Lys3                | CCC AGA AAT GCC AGA TTA CG         |
| LysM Cre      | Lys1                | CTT GGG CTG CCA GAA TTT CTC        |
| LysM Cre      | Lys2                | TTA CAG TCG GCC AGG CTG AC         |
| Tek Cre       | Tek Cre 800         | GCT GCC ACG ACC AAG TGA CAG CAA TG |
| Tek Cre       | Tek Cre 1200        | GTA GTT ATT CGG ATC ATC AGC TAC AC |
| mTmG          | mTmG_wt_forw        | CTC TGC TGC CTC CTG GCT TCT        |
| mTmG          | mTmG_wt_rev         | CGA GGC GGA TCA CAA GCA ATA        |
| mTmG          | mTmG_tg_rev         | TCA ATG GGC GGG GGT CGT T          |
| EndSCL Cre    | 987                 | ATG TTT AGC TGG CCC AAA TG         |
| EndSCL Cre    | 988                 | GCA ACG TGC TGG TTA TTG TG         |
| EndSCL Cre    | 989                 | AGC ATG CTC TTT TCC AGC AT         |
| EndSCL Cre    | 990                 | CTC AGG CTG GCC TAA AAC TG         |
| Actin         | FW                  | CTG AGA GGG AAA TCG TGC GT         |
| Actin         | RV                  | AAC CGC TCG TTG CCA ATA GT         |
| Cox10         | FW                  | AAG AAC AGG CCT CTG GTT CG         |
| Cox10         | RV                  | GCT CCA ACC CAG GTA TTG GT         |
| Endoglin      | FW                  | CCC TCT GCC CAT TAC CCT G          |
| Endoglin      | RV                  | GTA AAC GTC ACC TCA CCC CTT        |
| Acta2         | FW                  | GTC CCA GAC ATC AGG GAG TAA        |
| Acta2         | RV                  | TCG GAT ACT TCA GCG TCA GGA        |

**Supplementary Table 2: Antibody list**

| <b>Reference</b>          | <b>Antibody</b>                                                               | <b>Company</b>          |
|---------------------------|-------------------------------------------------------------------------------|-------------------------|
| cat. No.: 102515          | Alexa Fluor® 647 anti-mouse CD31 Antibody                                     | Biolegend               |
| cat. No.: 102406          | FITC anti-mouse CD31 Antibody                                                 | Biolegend               |
| cat. No.: ab119341        | Anti-CD31 antibody [2H8]                                                      | Abcam                   |
| cat. No.: ab109025        | Anti-COX1 / Cyclooxygenase 1 antibody [EPR5866]                               | Abcam                   |
| cat. No.: T9026           | Anti alpha-Tubulin                                                            | Sigma-Aldrich           |
| cat. No.: 10611-2-AP      | Rb pAb COX10                                                                  | Proteintech             |
| cat. No.: sc-47778<br>HRP | β-Actin Antikörper (C4) HRP                                                   | Santa Cruz              |
| cat. No.: 14-1402-82      | PDGFR CD140b mouse                                                            | eBiosciences            |
| cat. No.: ab173004        | Goat Anti-Armenian hamster IgG H&L (Alexa Fluor® 647)                         | Abcam                   |
| cat. No.: A-21244         | Goat anti-Rabbit IgG (H+L) Cross-Adsorbed Secondary Antibody, Alexa Fluor 647 | ThermoFisher Scientific |
| cat. No.: #7074           | Anti-rabbit IgG, HRP-linked Antibody                                          | Cell Signaling          |
